# Supplementary material for: A novel and robust pyroptosis-related prognostic signature predicts prognosis and response to immunotherapy in esophageal squamous cell carcinoma
Source: Aging (Albany NY). 2023 Aug 9;15(15):7811–30. doi: 10.18632/aging.204946 (PMC10457042; doi:10.18632/aging.204946)
Supplement: Supplementary Figures [file aging-15-204946-s001.pdf]

SUPPLEMENTARY FIGURES

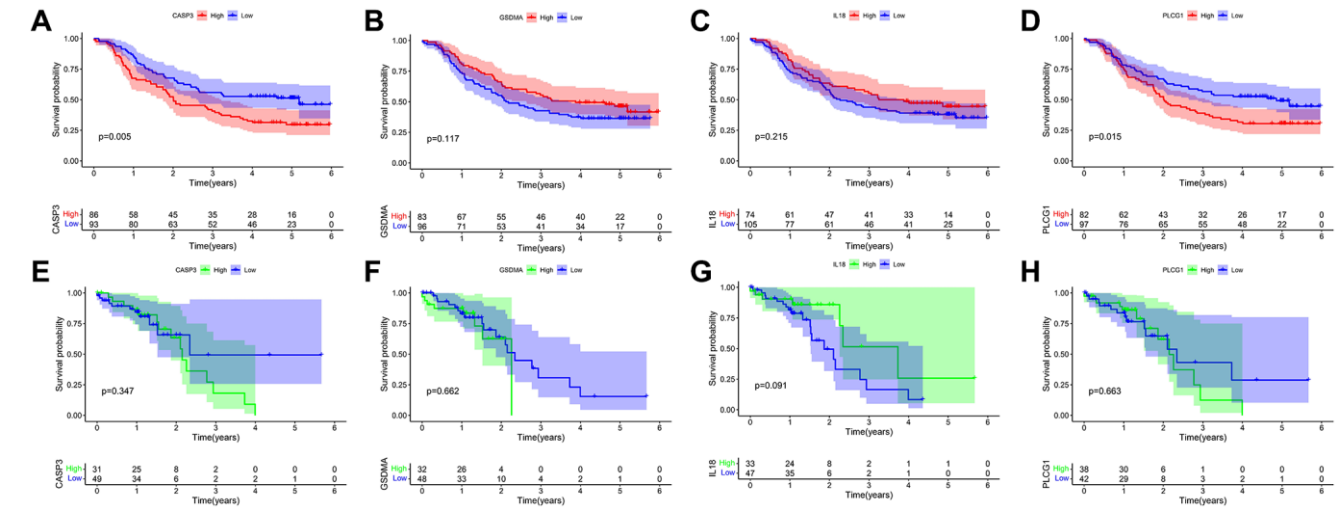

**Supplementary Figure 1. The correlation between four prognostic PRG. (A–D)** Survival analysis of CASP3, GSDMA, IL18, and PLCG1 in GEO cohort. **(E–H)** Survival analysis of CASP3, GSDMA, IL18, and PLCG1 in TCGA cohort.

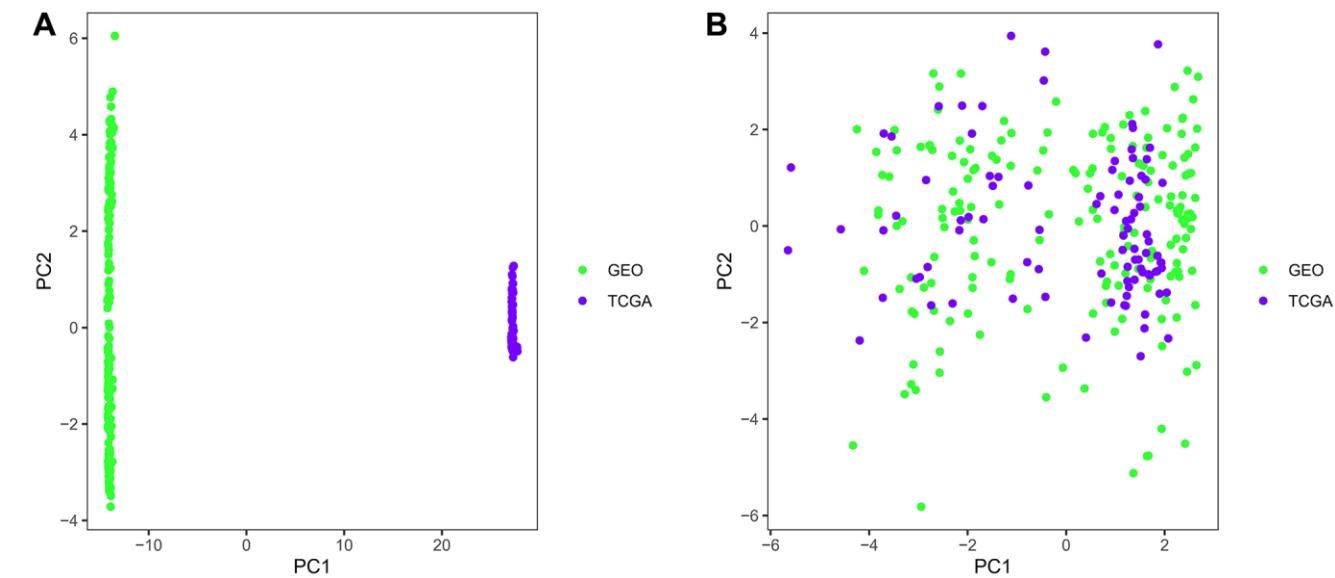

**Supplementary Figure 2. Batch results of GEO and TCGA cohorts. (A)** PCA analysis before batch. **(B)** PCA analysis after batch.

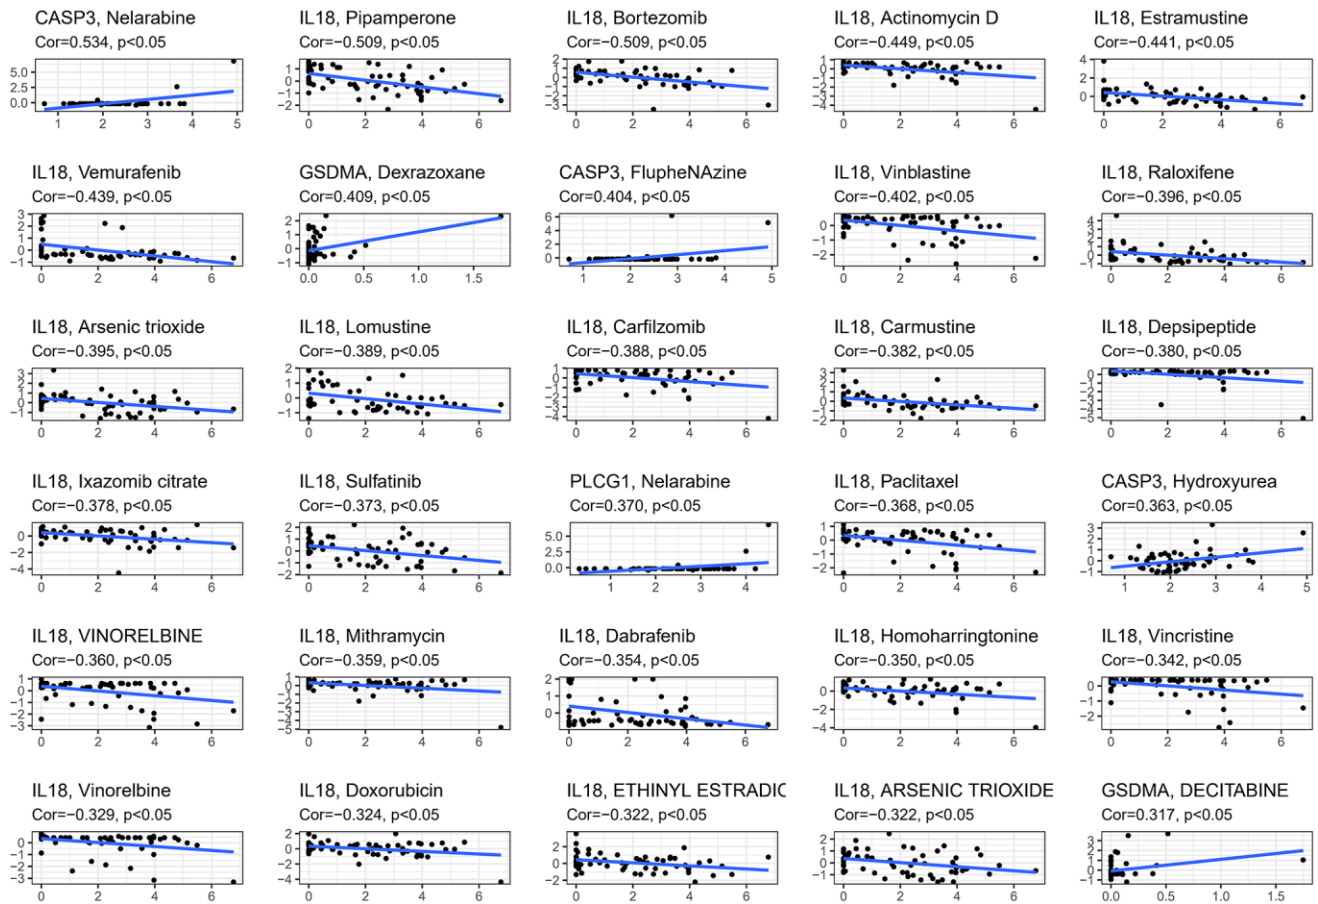

Supplementary Figure 3. Drug sensitivity.

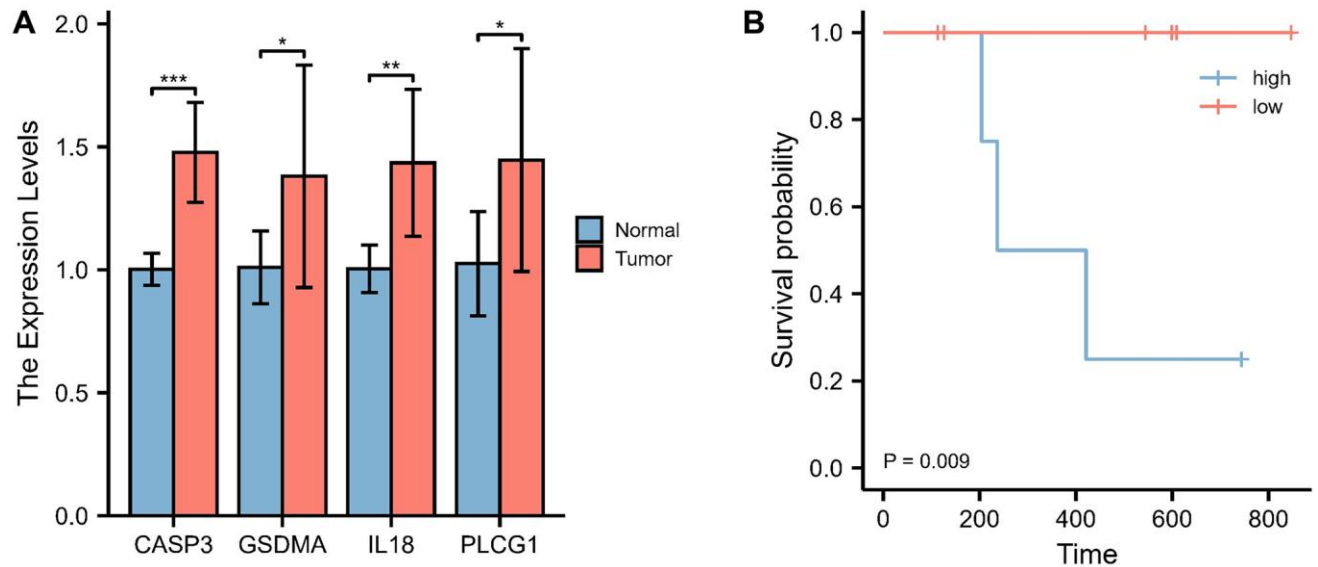

Supplementary Figure 4. Validation of risk signature in native cohort. (A) Survival analysis of native cohort. (B) qRT-PCR of the expression of 4 PRGs in 10 pairs tissues. \* $P < 0.05$ ; \*\* $P < 0.01$ ; \*\*\* $P < 0.001$ .
