# Supplementary material for: A novel and robust pyroptosis-related prognostic signature predicts prognosis and response to immunotherapy in esophageal squamous cell carcinoma
Source: publisher site journal article supplement (doi:10.18632/aging.204946), 2023-08-09
Supplement: Supplementary file [file aging-v15i15-204946-supplementary-material-SD2.pdf]

## SUPPLEMENTARY TABLES

**Supplementary Table 1. A list of significant immune cells based on 6 algorithms.**

| <b>Immune</b>                              | <b>P value</b> |
|--------------------------------------------|----------------|
| B cell_TIMER                               | 0.035561695    |
| B cell naive_CIBERSORT                     | 0.00650555     |
| Myeloid dendritic cell activated_CIBERSORT | 0.040464564    |
| B cell naive_CIBERSORT-ABS                 | 0.005395637    |
| T cell follicular helper_CIBERSORT-ABS     | 0.028348751    |
| T cell regulatory (Tregs)_CIBERSORT-ABS    | 0.034473007    |
| B cell_QUANTISEQ                           | 0.000457769    |
| Macrophage M2_QUANTISEQ                    | 0.008077602    |
| Neutrophil_QUANTISEQ                       | 0.002558986    |
| Cytotoxicity score_MCPCOUNTER              | 0.032221156    |
| Endothelial cell_XCELL                     | 0.036042945    |
| Cancer associated fibroblast_XCELL         | 0.002726991    |
| Hematopoietic stem cell_XCELL              | 0.034265358    |
| Monocyte_XCELL                             | 0.003936186    |
| Neutrophil_XCELL                           | 0.005765416    |
| Stroma score_XCELL                         | 0.043135121    |
| B cell_EPIC                                | 0.023155984    |

**Supplementary Table 2. Correlation analysis of immune cell and risk score based on 6 algorithms.**

| <b>Immune</b>                           | <b>Cor</b> | <b>P value</b> |
|-----------------------------------------|------------|----------------|
| T cell CD4+_TIMER                       | 0.2441     | 0.0293         |
| Macrophage_TIMER                        | 0.2478     | 0.0267         |
| B cell naive_CIBERSORT                  | 0.2835     | 0.0108         |
| B cell naive_CIBERSORT-ABS              | 0.2962     | 0.0076         |
| B cell_QUANTISEQ                        | 0.4226     | 0.0001         |
| Macrophage M2_QUANTISEQ                 | 0.3096     | 0.0052         |
| Neutrophil_QUANTISEQ                    | -0.3211    | 0.0037         |
| NK cell_QUANTISEQ                       | 0.2247     | 0.0453         |
| Myeloid dendritic cell_QUANTISEQ        | 0.2500     | 0.0253         |
| Cytotoxicity score_MCPCOUNTER           | 0.2348     | 0.0362         |
| NK cell_MCPCOUNTER                      | 0.2226     | 0.0474         |
| Cancer associated fibroblast_MCPCOUNTER | 0.2464     | 0.0278         |
| T cell CD8+ naive_XCELL                 | -0.2919    | 0.0086         |
| Cancer associated fibroblast_XCELL      | 0.4736     | 0.0000         |
| Hematopoietic stem cell_XCELL           | 0.2749     | 0.0136         |
| Monocyte_XCELL                          | -0.3466    | 0.0016         |
| Neutrophil_XCELL                        | -0.3123    | 0.0048         |
| Stroma score_XCELL                      | 0.3898     | 0.0004         |
| Uncharacterized cell_EPIC               | -0.2221    | 0.0479         |

**Supplementary Table 3. Correlation analysis of expression of PRGs involved in modeling and drug.**

| <b>Gene</b> | <b>Drug</b>       | <b>Cor</b> | <b>P value</b> |
|-------------|-------------------|------------|----------------|
| CASP3       | Nelarabine        | 0.5343     | 0.0000         |
| IL18        | Pipamperone       | -0.5090    | 0.0000         |
| IL18        | Bortezomib        | -0.5088    | 0.0000         |
| IL18        | Actinomycin D     | -0.4490    | 0.0003         |
| IL18        | Estramustine      | -0.4407    | 0.0004         |
| IL18        | Vemurafenib       | -0.4394    | 0.0004         |
| GSDMA       | Dexrazoxane       | 0.4093     | 0.0012         |
| CASP3       | FlupheNAzine      | 0.4039     | 0.0014         |
| IL18        | Vinblastine       | -0.4024    | 0.0014         |
| IL18        | Raloxifene        | -0.3963    | 0.0017         |
| IL18        | Arsenic trioxide  | -0.3948    | 0.0018         |
| IL18        | Lomustine         | -0.3894    | 0.0021         |
| IL18        | Carfilzomib       | -0.3880    | 0.0022         |
| IL18        | Carmustine        | -0.3823    | 0.0026         |
| IL18        | Depsipeptide      | -0.3801    | 0.0027         |
| IL18        | Ixazomib citrate  | -0.3776    | 0.0029         |
| IL18        | Sulfatinib        | -0.3732    | 0.0033         |
| PLCG1       | Nelarabine        | 0.3701     | 0.0036         |
| IL18        | Paclitaxel        | -0.3684    | 0.0038         |
| CASP3       | Hydroxyurea       | 0.3633     | 0.0043         |
| IL18        | VINORELBINE       | -0.3605    | 0.0047         |
| IL18        | Mithramycin       | -0.3591    | 0.0048         |
| IL18        | Dabrafenib        | -0.3542    | 0.0055         |
| IL18        | Homoharringtonine | -0.3499    | 0.0061         |
| IL18        | Vincristine       | -0.3420    | 0.0075         |
| IL18        | Vinorelbine       | -0.3286    | 0.0104         |
| IL18        | Doxorubicin       | -0.3237    | 0.0116         |
| IL18        | ETHINYL ESTRADIOL | -0.3217    | 0.0122         |
| IL18        | ARSENIC TRIOXIDE  | -0.3216    | 0.0122         |
| GSDMA       | DECITABINE        | 0.3172     | 0.0135         |
| IL18        | Irofulven         | 0.3149     | 0.0142         |
| IL18        | Epirubicin        | -0.3143    | 0.0145         |
| IL18        | Teniposide        | -0.3084    | 0.0165         |
| IL18        | Tamoxifen         | -0.3051    | 0.0178         |
| IL18        | Tegafur           | -0.2965    | 0.0214         |
| IL18        | Crizotinib        | -0.2962    | 0.0216         |
| PLCG1       | LDK-378           | -0.2894    | 0.0249         |
| IL18        | Afatinib          | 0.2887     | 0.0253         |
| IL18        | Ixabepilone       | -0.2827    | 0.0286         |
| IL18        | Encorafenib       | -0.2827    | 0.0286         |
| IL18        | Dacomitinib       | 0.2811     | 0.0296         |
| CASP3       | Bendamustine      | 0.2802     | 0.0301         |
| IL18        | Abiraterone       | -0.2784    | 0.0312         |
| CASP3       | Ifosfamide        | 0.2770     | 0.0322         |
| PLCG1       | RAPAMYCIN         | 0.2767     | 0.0323         |

|       |                   |         |        |
|-------|-------------------|---------|--------|
| GSDMA | Imiquimod         | 0.2754  | 0.0332 |
| CASP3 | Irofulven         | -0.2748 | 0.0336 |
| IL18  | Erlotinib         | 0.2731  | 0.0348 |
| IL18  | Etoposide         | -0.2720 | 0.0355 |
| IL18  | Nilotinib         | -0.2709 | 0.0363 |
| PLCG1 | brigatinib        | -0.2708 | 0.0363 |
| CASP3 | Lomustine         | 0.2706  | 0.0365 |
| CASP3 | Carmustine        | 0.2678  | 0.0385 |
| IL18  | Eribulin mesilate | -0.2674 | 0.0388 |
| CASP3 | AsparagiNase      | 0.2664  | 0.0396 |
| CASP3 | PF-06463922       | -0.2641 | 0.0415 |
| CASP3 | Chlorambucil      | 0.2636  | 0.0418 |
| PLCG1 | Fludarabine       | 0.2633  | 0.0421 |
| CASP3 | Calusterone       | 0.2595  | 0.0453 |
| CASP3 | Idarubicin        | 0.2563  | 0.0481 |

---
